# Supplementary material for: Feeding of cuticles from Tenebrio molitor larvae modulates the gut microbiota and attenuates hepatic steatosis in obese Zucker rats
Source: Royal Society of Chemistry journal article supplement (doi:10.1039/d1fo03920b), 2022-01-01
Supplement: d1fo03920b1.pdf [file d1fo03920b1.pdf]

**Table S1** Characteristics of gene-specific primers used for qPCR analysis

| Gene symbol            | Forward (5' to 3'), Reverse (5' to 3')         | PCR product size (bp) | NCBI GenBank accession no. |
|------------------------|------------------------------------------------|-----------------------|----------------------------|
| <i>Reference genes</i> |                                                |                       |                            |
| <i>Actb</i>            | GACCTCTATGCCAACACAGT, CACCAATCCACACAGAGTAC     | 154                   | NM_031144                  |
| <i>Rpl13</i>           | CCAGATGCAGATCTGAAGAC, CTGGGTCCTCAATTTACAGT     | 175                   | NM_172008                  |
| <i>Top1</i>            | GAAGAACGCTATCCAGAAGG, GCTTTGGGACTCAGCTTCAT     | 137                   | NM_022615                  |
| <i>Target genes</i>    |                                                |                       |                            |
| <i>Acadm</i>           | CAAGAGAGCCTGGGAACTTG, CCCCAAAGAATTTGCTTCAA     | 154                   | NM_016986                  |
| <i>Acox1</i>           | CTCAGCAGGAGAAATGGATGCG, TCCTTGAGTGATGAGCTGAGCC | 239                   | NM_017340                  |
| <i>Cact</i>            | AGCCCACCTGTTATCCACTG, TGTGCAAAAAGAGCCTTCCT     | 178                   | NM_053965                  |
| <i>Cpt1a</i>           | ACCGCCATCTCTTCTGCCTC, CTGCTGAGGAGTCTGGCTCG     | 116                   | NM_031559                  |
| <i>Fasn</i>            | AGGTGCTAGAGGCCCTGCTA, GTGCACAGACACCTTCCCAT     | 281                   | NM_017332                  |
| <i>G6pd</i>            | TTGTACCAGGGTGATGCCTTCC, GCTCACTCTGTTTGCGGATGTC | 199                   | NM_017006                  |
| <i>Hmgcr</i>           | TGGCAGGACGCAACCTCTAC, GGCAGCAGGTTTCTTGTCGG     | 173                   | NM_013134                  |
| <i>Scd</i>             | TGCACCCCCAGACACTTGTA, GGATGCATGGAAACGCCATAG    | 94                    | NM_031841                  |

Abbreviations: *Acadm*, acyl-CoA dehydrogenase medium chain; *Acox1*, acyl-CoA oxidase 1; *Actb*, actin beta; *Cact*, carnitine/acylcarnitine translocase; *Cpt1a*, carnitine palmitoyltransferase 1A; *Fasn*, fatty acid synthase; *G6pd*, glucose-6-phosphate dehydrogenase; *Hmgcr*, 3-hydroxy-3-methylglutaryl-CoA reductase; *Rpl13*, ribosomal protein L13; *Scd*, stearoyl-CoA desaturase; *Top1*, DNA topoisomerase I.

**Table S2** Operational taxonomic units (OUT) identified in cecum digesta of all experimental groups

| OTU    | Phylum          | Class            | Order              | Family                | Genus                     |
|--------|-----------------|------------------|--------------------|-----------------------|---------------------------|
| OTU_1  | Firmicutes      | Clostridia       | Clostridiales      | Clostridiaceae 1      | Clostridium sensu stricto |
| OTU_2  | Verrucomicrobia | Verrucomicrobiae | Verrucomicrobiales | Verrucomicrobiaceae   | Akkermansia               |
| OTU_3  | Firmicutes      | Clostridia       | Clostridiales      | -                     | -                         |
| OTU_4  | Firmicutes      | Clostridia       | Clostridiales      | Lachnospiraceae       | -                         |
| OTU_5  | Bacteroidetes   | Bacteroidia      | Bacteroidales      | Bacteroidaceae        | Bacteroides               |
| OTU_6  | Firmicutes      | Erysipelotrichia | Erysipelotrichales | Erysipelotrichaceae   | Allobaculum               |
| OTU_7  | Bacteroidetes   | Bacteroidia      | Bacteroidales      | Bacteroidaceae        | Bacteroides               |
| OTU_8  | Bacteroidetes   | Bacteroidia      | Bacteroidales      | Bacteroidaceae        | Bacteroides               |
| OTU_9  | Firmicutes      | Clostridia       | Clostridiales      | Lachnospiraceae       | -                         |
| OTU_10 | Firmicutes      | Clostridia       | Clostridiales      | Ruminococcaceae       | Ruminococcus              |
| OTU_11 | Firmicutes      | Bacilli          | Lactobacillales    | Lactobacillaceae      | Lactobacillus             |
| OTU_12 | Firmicutes      | Bacilli          | Lactobacillales    | Lactobacillaceae      | Lactobacillus             |
| OTU_13 | Bacteroidetes   | Bacteroidia      | Bacteroidales      | Bacteroidaceae        | Bacteroides               |
| OTU_14 | Bacteroidetes   | Bacteroidia      | Bacteroidales      | Prevotellaceae        | Alloprevotella            |
| OTU_15 | Firmicutes      | Clostridia       | Clostridiales      | Ruminococcaceae       | -                         |
| OTU_16 | Firmicutes      | Clostridia       | Clostridiales      | Peptostreptococcaceae | Clostridium XI            |
| OTU_17 | Bacteroidetes   | Bacteroidia      | Bacteroidales      | Bacteroidaceae        | Bacteroides               |
| OTU_18 | Firmicutes      | Clostridia       | Clostridiales      | Lachnospiraceae       | Clostridium XIVa          |

|        |                 |                  |                    |                       |                           |
|--------|-----------------|------------------|--------------------|-----------------------|---------------------------|
| OTU_19 | Bacteroidetes   | Bacteroidia      | Bacteroidales      | Rikenellaceae         | Alistipes                 |
| OTU_20 | Deferribacteres | Deferribacteres  | Deferribacterales  | Deferribacteraceae    | Mucispirillum             |
| OTU_21 | Firmicutes      | Clostridia       | Clostridiales      | Ruminococcaceae       | -                         |
| OTU_22 | Firmicutes      | Clostridia       | Clostridiales      | Lachnospiraceae       | -                         |
| OTU_23 | Firmicutes      | Clostridia       | Clostridiales      | Ruminococcaceae       | -                         |
| OTU_24 | Firmicutes      | Clostridia       | Clostridiales      | Ruminococcaceae       | -                         |
| OTU_25 | Firmicutes      | Clostridia       | Clostridiales      | Clostridiaceae 1      | Clostridium sensu stricto |
| OTU_26 | Firmicutes      | Clostridia       | Clostridiales      | Lachnospiraceae       | -                         |
| OTU_27 | Bacteroidetes   | Bacteroidia      | Bacteroidales      | Porphyromonadaceae    | Parabacteroides           |
| OTU_28 | Firmicutes      | Clostridia       | Clostridiales      | Ruminococcaceae       | Oscillibacter             |
| OTU_29 | Firmicutes      | Clostridia       | Clostridiales      | Clostridiaceae 1      | Clostridium sensu stricto |
| OTU_30 | Firmicutes      | Clostridia       | Clostridiales      | Peptostreptococcaceae | Clostridium XI            |
| OTU_31 | Bacteroidetes   | Bacteroidia      | Bacteroidales      | Porphyromonadaceae    | Parabacteroides           |
| OTU_32 | Firmicutes      | Clostridia       | Clostridiales      | Lachnospiraceae       | Clostridium XIVa          |
| OTU_33 | Firmicutes      | Erysipelotrichia | Erysipelotrichales | Erysipelotrichaceae   | Turcibacter               |
| OTU_34 | Firmicutes      | Clostridia       | Clostridiales      | Ruminococcaceae       | Flavonifractor            |
| OTU_35 | Firmicutes      | Clostridia       | Clostridiales      | Lachnospiraceae       | -                         |
| OTU_36 | Bacteroidetes   | Bacteroidia      | Bacteroidales      | Porphyromonadaceae    | -                         |
| OTU_37 | Bacteroidetes   | Bacteroidia      | Bacteroidales      | Porphyromonadaceae    | -                         |
| OTU_38 | Bacteroidetes   | Bacteroidia      | Bacteroidales      | Porphyromonadaceae    | -                         |

|        |                |                     |                    |                     |                       |
|--------|----------------|---------------------|--------------------|---------------------|-----------------------|
| OTU_39 | Proteobacteria | Alphaproteobacteria | -                  | -                   | -                     |
| OTU_40 | Firmicutes     | Clostridia          | Clostridiales      | Lachnospiraceae     | -                     |
| OTU_41 | Bacteroidetes  | Bacteroidia         | Bacteroidales      | Rikenellaceae       | Alistipes             |
| OTU_42 | Firmicutes     | Clostridia          | Clostridiales      | Ruminococcaceae     | -                     |
| OTU_43 | Firmicutes     | Bacilli             | Lactobacillales    | Lactobacillaceae    | Lactobacillus         |
| OTU_44 | Firmicutes     | Clostridia          | Clostridiales      | Ruminococcaceae     | Ruminococcus          |
| OTU_45 | Proteobacteria | Deltaproteobacteria | Desulfovibrionales | Desulfovibrionaceae | Desulfovibrio         |
| OTU_46 | Bacteroidetes  | Bacteroidia         | Bacteroidales      | -                   | -                     |
| OTU_47 | Proteobacteria | Gammaproteobacteria | Enterobacteriales  | Enterobacteriaceae  | Escherichia/Shigella  |
| OTU_48 | Firmicutes     | Clostridia          | Clostridiales      | -                   | -                     |
| OTU_49 | Proteobacteria | Deltaproteobacteria | Desulfovibrionales | Desulfovibrionaceae | Bilophila             |
| OTU_50 | Firmicutes     | Clostridia          | Clostridiales      | Lachnospiraceae     | Coprococcus           |
| OTU_51 | Bacteroidetes  | Bacteroidia         | Bacteroidales      | Porphyromonadaceae  | -                     |
| OTU_52 | Bacteroidetes  | Bacteroidia         | Bacteroidales      | Bacteroidaceae      | Bacteroides           |
| OTU_53 | Firmicutes     | Negativicutes       | Selenomonadales    | Acidaminococcaceae  | Phascolarctobacterium |
| OTU_54 | Firmicutes     | Clostridia          | Clostridiales      | Lachnospiraceae     | -                     |
| OTU_55 | Bacteroidetes  | Bacteroidia         | Bacteroidales      | Rikenellaceae       | Alistipes             |
| OTU_56 | Firmicutes     | Clostridia          | Clostridiales      | Lachnospiraceae     | -                     |
| OTU_57 | Proteobacteria | Deltaproteobacteria | Desulfovibrionales | Desulfovibrionaceae | Desulfovibrio         |
| OTU_58 | Firmicutes     | Clostridia          | Clostridiales      | Lachnospiraceae     | -                     |

|        |                |                     |                   |                    |                  |
|--------|----------------|---------------------|-------------------|--------------------|------------------|
| OTU_59 | Firmicutes     | Clostridia          | Clostridiales     | Ruminococcaceae    | -                |
| OTU_60 | Firmicutes     | Clostridia          | Clostridiales     | Lachnospiraceae    | Clostridium XIVb |
| OTU_61 | Firmicutes     | Clostridia          | Clostridiales     | Ruminococcaceae    | -                |
| OTU_62 | Firmicutes     | Clostridia          | Clostridiales     | Lachnospiraceae    | Roseburia        |
| OTU_63 | Firmicutes     | Clostridia          | Clostridiales     | Peptococcaceae 1   | Peptococcus      |
| OTU_64 | Bacteroidetes  | Bacteroidia         | Bacteroidales     | Porphyromonadaceae | Parabacteroides  |
| OTU_65 | Firmicutes     | Clostridia          | Clostridiales     | -                  | -                |
| OTU_66 | Bacteroidetes  | Bacteroidia         | Bacteroidales     | Porphyromonadaceae | -                |
| OTU_67 | Bacteroidetes  | Bacteroidia         | Bacteroidales     | Rikenellaceae      | Alistipes        |
| OTU_68 | Firmicutes     | Clostridia          | Clostridiales     | Eubacteriaceae     | Eubacterium      |
| OTU_69 | Tenericutes    | Mollicutes          | Anaeroplasmatales | Anaeroplasmataceae | Anaeroplasma     |
| OTU_70 | Bacteroidetes  | Bacteroidia         | Bacteroidales     | -                  | -                |
| OTU_71 | Bacteroidetes  | Bacteroidia         | Bacteroidales     | Porphyromonadaceae | Odoribacter      |
| OTU_72 | Firmicutes     | Clostridia          | Clostridiales     | Ruminococcaceae    | -                |
| OTU_73 | Bacteroidetes  | Bacteroidia         | Bacteroidales     | Porphyromonadaceae | -                |
| OTU_74 | Firmicutes     | Clostridia          | Clostridiales     | Lachnospiraceae    | -                |
| OTU_75 | Firmicutes     | Clostridia          | Clostridiales     | Ruminococcaceae    | -                |
| OTU_76 | Bacteroidetes  | Bacteroidia         | Bacteroidales     | Porphyromonadaceae | -                |
| OTU_77 | Proteobacteria | Alphaproteobacteria | -                 | -                  | -                |
| OTU_78 | Actinobacteria | Actinobacteria      | Bifidobacteriales | Bifidobacteriaceae | Bifidobacterium  |

|         |                |                     |                    |                       |                   |
|---------|----------------|---------------------|--------------------|-----------------------|-------------------|
| OTU_79  | Firmicutes     | Erysipelotrichia    | Erysipelotrichales | Erysipelotrichaceae   | Clostridium XVIII |
| OTU_80  | Bacteroidetes  | Bacteroidia         | Bacteroidales      | Porphyromonadaceae    | -                 |
| OTU_81  | Firmicutes     | Clostridia          | Clostridiales      | -                     | -                 |
| OTU_83  | Firmicutes     | Clostridia          | Clostridiales      | Ruminococcaceae       | -                 |
| OTU_84  | Firmicutes     | Clostridia          | Clostridiales      | Ruminococcaceae       | Clostridium IV    |
| OTU_85  | Firmicutes     | Clostridia          | Clostridiales      | Peptostreptococcaceae | Clostridium XI    |
| OTU_86  | Bacteroidetes  | Bacteroidia         | Bacteroidales      | Porphyromonadaceae    | Butyricimonas     |
| OTU_87  | Firmicutes     | Clostridia          | Clostridiales      | Lachnospiraceae       | -                 |
| OTU_88  | Firmicutes     | Clostridia          | Clostridiales      | Lachnospiraceae       | -                 |
| OTU_90  | Bacteroidetes  | Bacteroidia         | Bacteroidales      | Porphyromonadaceae    | -                 |
| OTU_92  | Firmicutes     | Clostridia          | Clostridiales      | Ruminococcaceae       | -                 |
| OTU_94  | Proteobacteria | Betaproteobacteria  | Burkholderiales    | Sutterellaceae        | Parasutterella    |
| OTU_95  | Firmicutes     | Clostridia          | Clostridiales      | Lachnospiraceae       | -                 |
| OTU_97  | Firmicutes     | Clostridia          | Clostridiales      | -                     | -                 |
| OTU_98  | Firmicutes     | Clostridia          | Clostridiales      | Lachnospiraceae       | -                 |
| OTU_99  | Proteobacteria | Deltaproteobacteria | -                  | -                     | -                 |
| OTU_100 | Firmicutes     | Clostridia          | Clostridiales      | -                     | -                 |
| OTU_102 | Firmicutes     | Clostridia          | Clostridiales      | Lachnospiraceae       | -                 |
| OTU_104 | Firmicutes     | Clostridia          | Clostridiales      | Lachnospiraceae       | -                 |
| OTU_106 | Firmicutes     | Clostridia          | Clostridiales      | Lachnospiraceae       | Clostridium XIVb  |

|         |                |                     |                    |                     |                               |
|---------|----------------|---------------------|--------------------|---------------------|-------------------------------|
| OTU_107 | Bacteroidetes  | Bacteroidia         | Bacteroidales      | Bacteroidaceae      | Bacteroides                   |
| OTU_109 | Firmicutes     | Clostridia          | Clostridiales      | Lachnospiraceae     | Lachnospiracea_incertae_sedis |
| OTU_111 | Proteobacteria | Alphaproteobacteria | -                  | -                   | -                             |
| OTU_112 | Firmicutes     | Clostridia          | Clostridiales      | Lachnospiraceae     | -                             |
| OTU_113 | Firmicutes     | Clostridia          | Clostridiales      | Ruminococcaceae     | Clostridium IV                |
| OTU_114 | Firmicutes     | Erysipelotrichia    | Erysipelotrichales | Erysipelotrichaceae | -                             |
| OTU_115 | Proteobacteria | Alphaproteobacteria | -                  | -                   | -                             |
| OTU_116 | Bacteroidetes  | Bacteroidia         | Bacteroidales      | Porphyromonadaceae  | Odoribacter                   |
| OTU_117 | Bacteroidetes  | Bacteroidia         | Bacteroidales      | Porphyromonadaceae  | Butyricimonas                 |
| OTU_118 | Firmicutes     | Clostridia          | Clostridiales      | Lachnospiraceae     | -                             |
| OTU_119 | Firmicutes     | Clostridia          | Clostridiales      | Lachnospiraceae     | -                             |
| OTU_121 | Actinobacteria | Actinobacteria      | Coriobacteriales   | Coriobacteriaceae   | Olsenella                     |
| OTU_124 | Firmicutes     | Clostridia          | Clostridiales      | Lachnospiraceae     | Clostridium XIVa              |
| OTU_125 | Firmicutes     | Clostridia          | Clostridiales      | Lachnospiraceae     | Blautia                       |
| OTU_127 | Firmicutes     | Clostridia          | Clostridiales      | Lachnospiraceae     | -                             |
| OTU_128 | Firmicutes     | Clostridia          | Clostridiales      | Ruminococcaceae     | -                             |
| OTU_130 | Bacteroidetes  | Bacteroidia         | Bacteroidales      | Porphyromonadaceae  | -                             |
| OTU_132 | Bacteroidetes  | Bacteroidia         | Bacteroidales      | Porphyromonadaceae  | Barnesiella                   |
| OTU_133 | Bacteroidetes  | Bacteroidia         | Bacteroidales      | Porphyromonadaceae  | Parabacteroides               |
| OTU_135 | Firmicutes     | Clostridia          | Clostridiales      | Ruminococcaceae     | -                             |

|         |                                |                                            |                                            |                                            |                                             |
|---------|--------------------------------|--------------------------------------------|--------------------------------------------|--------------------------------------------|---------------------------------------------|
| OTU_139 | Firmicutes                     | Erysipelotrichia                           | Erysipelotrichales                         | Erysipelotrichaceae                        | -                                           |
| OTU_140 | -                              | -                                          | -                                          | -                                          | -                                           |
| OTU_146 | Firmicutes                     | Clostridia                                 | Clostridiales                              | Ruminococcaceae                            | -                                           |
| OTU_153 | Bacteroidetes                  | -                                          | -                                          | -                                          | -                                           |
| OTU_154 | Firmicutes                     | Bacilli                                    | Bacillales                                 | -                                          | -                                           |
| OTU_159 | Firmicutes                     | -                                          | -                                          | -                                          | -                                           |
| OTU_160 | Bacteroidetes                  | Bacteroidia                                | Bacteroidales                              | Rikenellaceae                              | Alistipes                                   |
| OTU_166 | Firmicutes                     | Clostridia                                 | Clostridiales                              | Clostridiaceae 1                           | Clostridium sensu stricto                   |
| OTU_167 | Firmicutes                     | Clostridia                                 | Clostridiales                              | Lachnospiraceae                            | -                                           |
| OTU_168 | Firmicutes                     | Clostridia                                 | Clostridiales                              | Lachnospiraceae                            | -                                           |
| OTU_174 | Bacteroidetes                  | Bacteroidia                                | Bacteroidales                              | Bacteroidaceae                             | Bacteroides                                 |
| OTU_176 | Firmicutes                     | Erysipelotrichia                           | Erysipelotrichales                         | Erysipelotrichaceae                        | Allobaculum                                 |
| OTU_180 | Firmicutes                     | Clostridia                                 | Clostridiales                              | Lachnospiraceae                            | -                                           |
| OTU_187 | Firmicutes                     | Clostridia                                 | Clostridiales                              | Lachnospiraceae                            | -                                           |
| OTU_194 | Firmicutes                     | Erysipelotrichia                           | Erysipelotrichales                         | Erysipelotrichaceae                        | Allobaculum                                 |
| OTU_197 | Firmicutes                     | Clostridia                                 | Clostridiales                              | Lachnospiraceae                            | Clostridium XIVa                            |
| OTU_202 | Firmicutes                     | Clostridia                                 | Clostridiales                              | Lachnospiraceae                            | -                                           |
| OTU_206 | Candidatus<br>Saccharibacteria | Saccharibacteria_genera<br>_incertae_sedis | Saccharibacteria_gene<br>ra_incertae_sedis | Saccharibacteria_genera<br>_incertae_sedis | Saccharibacteria_genera_<br>incerta_e_sedis |
| OTU_212 | Firmicutes                     | Clostridia                                 | Clostridiales                              | Lachnospiraceae                            | -                                           |



|         |               |             |                 |                  |               |
|---------|---------------|-------------|-----------------|------------------|---------------|
| OTU_274 | Bacteroidetes | Bacteroidia | Bacteroidales   | Bacteroidaceae   | Bacteroides   |
| OTU_315 | Firmicutes    | Clostridia  | Clostridiales   | Lachnospiraceae  | -             |
| OTU_516 | Firmicutes    | Clostridia  | Clostridiales   | Ruminococcaceae  | Ruminococcus  |
| OTU_531 | Firmicutes    | Clostridia  | Clostridiales   | Ruminococcaceae  | -             |
| OTU_535 | Firmicutes    | Clostridia  | Clostridiales   | Clostridiaceae 1 | -             |
| OTU_537 | Firmicutes    | Clostridia  | Clostridiales   | Lachnospiraceae  | -             |
| OTU_544 | Firmicutes    | Clostridia  | Clostridiales   | Lachnospiraceae  | -             |
| OTU_554 | Firmicutes    | Clostridia  | Clostridiales   | Ruminococcaceae  | -             |
| OTU_580 | Firmicutes    | Clostridia  | Clostridiales   | Lachnospiraceae  | -             |
| OTU_632 | Firmicutes    | Clostridia  | Clostridiales   | Lachnospiraceae  | Blautia       |
| OTU_662 | Firmicutes    | Clostridia  | Clostridiales   | Lachnospiraceae  | -             |
| OTU_692 | Firmicutes    | Clostridia  | Clostridiales   | Ruminococcaceae  | -             |
| OTU_701 | Firmicutes    | Bacilli     | Lactobacillales | Lactobacillaceae | Lactobacillus |
| OTU_703 | Firmicutes    | Clostridia  | Clostridiales   | Ruminococcaceae  | -             |
| OTU_729 | Firmicutes    | Clostridia  | Clostridiales   | Lachnospiraceae  | -             |

---

**Table S3** Concentrations of plasma metabolites with statistical differences as identified by targeted plasma metabolomics of lean rats fed a nutrient-adequate basal diet (group L) and obese rats fed the same basal diet supplemented with 0% (O), 1.5% (group O1.5) and 3.0% insects' cuticles (group O3.0) for 4 weeks

| Metabolite class    | Metabolite                     | L                 | O                          | O1.5                        | O3.0                       | <i>p</i> -value |        |
|---------------------|--------------------------------|-------------------|----------------------------|-----------------------------|----------------------------|-----------------|--------|
|                     |                                | $\mu\text{mol/L}$ |                            |                             |                            | L vs. O         | Suppl* |
| Acylcarnitines      | Free carnitine                 | 42.8 ± 6.2        | 32.3 ± 6.2 <sup>a</sup>    | 35.9 ± 5.6 <sup>a</sup>     | 28.6 ± 5.4 <sup>b</sup>    | 0.001           | 0.029  |
| Acylcarnitines      | Butyrylcarnitine               | 1.94 ± 0.42       | 2.31 ± 0.30 <sup>b</sup>   | 2.52 ± 0.50 <sup>ab</sup>   | 2.98 ± 0.75 <sup>a</sup>   | 0.042           | 0.030  |
| Amine oxides        | Trimethylamine <i>N</i> -oxide | 1.01 ± 0.22       | 1.26 ± 0.28 <sup>b</sup>   | 1.33 ± 0.19 <sup>b</sup>    | 1.65 ± 0.25 <sup>a</sup>   | 0.041           | 0.003  |
| Amino acids         | Asparagine                     | 89.4 ± 14.3       | 81.2 ± 11.0 <sup>a</sup>   | 80.5 ± 9.3 <sup>a</sup>     | 66.0 ± 11.7 <sup>b</sup>   | 0.166           | 0.005  |
| Amino acids         | Glutamine                      | 928 ± 67.8        | 863 ± 111 <sup>a</sup>     | 926 ± 90 <sup>a</sup>       | 724 ± 130 <sup>b</sup>     | 0.131           | 0.001  |
| Amino acids         | Glycine                        | 174 ± 37          | 87.8 ± 10.0 <sup>a</sup>   | 90.3 ± 10.5 <sup>a</sup>    | 75.1 ± 12.8 <sup>b</sup>   | <0.001          | 0.011  |
| Amino acids         | Histidine                      | 65.3 ± 8.3        | 102 ± 7 <sup>a</sup>       | 101 ± 10 <sup>ab</sup>      | 89.8 ± 12.3 <sup>b</sup>   | <0.001          | 0.018  |
| Amino acids         | Phenylalanine                  | 88.0 ± 10.8       | 116 ± 9 <sup>a</sup>       | 111 ± 11 <sup>ab</sup>      | 104 ± 10 <sup>b</sup>      | <0.001          | 0.044  |
| Amino acids         | Serine                         | 215 ± 23          | 186 ± 20 <sup>a</sup>      | 184 ± 22 <sup>a</sup>       | 159 ± 20 <sup>b</sup>      | 0.009           | 0.011  |
| Amino acids-related | Anserine                       | 5.04 ± 0.69       | 3.78 ± 1.07 <sup>a</sup>   | 3.31 ± 0.74 <sup>ab</sup>   | 2.55 ± 0.96 <sup>b</sup>   | 0.006           | 0.022  |
| Amino acids-related | Proline betaine                | 0.13 ± 0.02       | 0.12 ± 0.02 <sup>c</sup>   | 0.18 ± 0.02 <sup>b</sup>    | 0.21 ± 0.03 <sup>a</sup>   | 0.242           | <0.001 |
| Bile acids          | DCA                            | 0.12 ± 0.02       | 0.18 ± 0.07 <sup>b</sup>   | 0.19 ± 0.10 <sup>b</sup>    | 0.34 ± 0.12 <sup>a</sup>   | 0.128           | 0.004  |
| Bile acids          | TDCA                           | 0.02 ± 0.01       | 0.05 ± 0.02 <sup>b</sup>   | 0.09 ± 0.06 <sup>ab</sup>   | 0.11 ± 0.04 <sup>a</sup>   | <0.001          | 0.005  |
| Bile acids          | TLCA                           | < LOD             | 0.003 ± 0.001 <sup>b</sup> | 0.003 ± 0.001 <sup>ab</sup> | 0.005 ± 0.001 <sup>a</sup> | -               | 0.013  |

|                      |                     |             |                           |                           |                           |        |        |
|----------------------|---------------------|-------------|---------------------------|---------------------------|---------------------------|--------|--------|
| Biogenic amines      | Putrescine          | 1.14 ± 0.09 | 1.21 ± 0.24 <sup>ab</sup> | 1.37 ± 0.17 <sup>a</sup>  | 1.05 ± 0.32 <sup>b</sup>  | 0.739  | 0.033  |
| Biogenic amines      | β-alanine           | 4.01 ± 0.82 | 2.78 ± 0.46 <sup>ab</sup> | 2.86 ± 0.56 <sup>a</sup>  | 2.30 ± 0.43 <sup>b</sup>  | 0.001  | 0.034  |
| Ceramides            | Cer(d18:1/22:0)     | 0.51 ± 0.12 | 2.62 ± 0.40 <sup>ab</sup> | 2.89 ± 0.48 <sup>a</sup>  | 2.31 ± 0.48 <sup>b</sup>  | <0.001 | 0.028  |
| Ceramides            | Cer(d18:1/24:1)     | 0.74 ± 0.16 | 3.94 ± 1.28 <sup>ab</sup> | 4.34 ± 1.03 <sup>a</sup>  | 2.95 ± 0.69 <sup>b</sup>  | <0.001 | 0.016  |
| Ceramides            | Cer(d18:1/26:0)     | 0.13 ± 0.04 | 0.17 ± 0.05 <sup>b</sup>  | 0.24 ± 0.05 <sup>a</sup>  | 0.17 ± 0.06 <sup>b</sup>  | 0.052  | 0.011  |
| Ceramides            | Cer(d18:1/26:1)     | 0.04 ± 0.01 | 0.06 ± 0.02 <sup>ab</sup> | 0.07 ± 0.01 <sup>a</sup>  | 0.05 ± 0.01 <sup>b</sup>  | 0.002  | 0.003  |
| Ceramides            | Cer(d18:1/20:0(OH)) | < LOD       | 0.94 ± 0.30 <sup>ab</sup> | 1.29 ± 0.49 <sup>a</sup>  | 0.76 ± 0.15 <sup>b</sup>  | -      | 0.031  |
| Ceramides            | Cer(d18:2/16:0)     | < LOD       | 0.06 ± 0.01 <sup>b</sup>  | 0.08 ± 0.02 <sup>a</sup>  | 0.06 ± 0.01 <sup>ab</sup> | -      | 0.036  |
| Cholesterol esters   | CE(14:1)            | < LOD       | 0.17 ± 0.04 <sup>b</sup>  | 0.24 ± 0.07 <sup>a</sup>  | 0.18 ± 0.06 <sup>ab</sup> | -      | 0.041  |
| Cholesterol esters   | CE(22:2)            | 0.17 ± 0.04 | 0.42 ± 0.12 <sup>b</sup>  | 0.64 ± 0.23 <sup>a</sup>  | 0.54 ± 0.16 <sup>ab</sup> | <0.001 | 0.043  |
| Diacylglycerols      | DG(16:0_18:1)       | 4.16 ± 1.63 | 6.08 ± 1.26 <sup>b</sup>  | 6.72 ± 1.25 <sup>ab</sup> | 8.28 ± 2.27 <sup>a</sup>  | 0.009  | 0.018  |
| Glycerophospholipids | PC aa C32:0         | 10.1 ± 1.7  | 18.8 ± 3.5 <sup>ab</sup>  | 21.0 ± 3.5 <sup>a</sup>   | 15.9 ± 2.6 <sup>b</sup>   | <0.001 | 0.005  |
| Glycerophospholipids | PC aa C32:1         | 16.6 ± 5.2  | 47.6 ± 6.2 <sup>b</sup>   | 58.9 ± 8.3 <sup>a</sup>   | 44.4 ± 7.5 <sup>b</sup>   | <0.001 | <0.001 |
| Glycerophospholipids | PC aa C32:2         | 4.33 ± 1.05 | 4.89 ± 0.96 <sup>b</sup>  | 5.92 ± 0.69 <sup>a</sup>  | 5.03 ± 1.06 <sup>ab</sup> | 0.229  | 0.038  |
| Glycerophospholipids | PC aa C34:1         | 73.6 ± 16.5 | 207 ± 27 <sup>b</sup>     | 243 ± 22 <sup>a</sup>     | 195 ± 31 <sup>b</sup>     | <0.001 | 0.001  |
| Glycerophospholipids | PC aa C34:2         | 192 ± 24    | 240 ± 34 <sup>ab</sup>    | 270 ± 28 <sup>a</sup>     | 231 ± 31 <sup>b</sup>     | 0.002  | 0.024  |
| Glycerophospholipids | PC aa C36:1         | 19.8 ± 5.4  | 92.6 ± 12.1 <sup>ab</sup> | 106 ± 12 <sup>a</sup>     | 88.8 ± 15.7 <sup>b</sup>  | <0.001 | 0.016  |
| Glycerophospholipids | PC ae C32:1         | 0.82 ± 0.14 | 1.47 ± 0.24 <sup>ab</sup> | 1.69 ± 0.18 <sup>a</sup>  | 1.40 ± 0.19 <sup>b</sup>  | <0.001 | <0.001 |
| Glycerophospholipids | PC ae C34:1         | 3.29 ± 0.65 | 6.28 ± 1.03 <sup>b</sup>  | 7.48 ± 0.85 <sup>a</sup>  | 5.66 ± 1.03 <sup>b</sup>  | <0.001 | <0.001 |
| Glycerophospholipids | PC ae C34:2         | 2.40 ± 0.43 | 2.36 ± 0.32 <sup>b</sup>  | 2.75 ± 0.35 <sup>a</sup>  | 2.17 ± 0.30 <sup>b</sup>  | 0.853  | 0.001  |

|                      |                         |             |                           |                           |                           |        |        |
|----------------------|-------------------------|-------------|---------------------------|---------------------------|---------------------------|--------|--------|
| Glycerophospholipids | PC ae C36:4             | 4.23 ± 0.74 | 6.86 ± 0.90 <sup>b</sup>  | 7.93 ± 0.82 <sup>a</sup>  | 6.30 ± 0.98 <sup>b</sup>  | <0.001 | 0.001  |
| Glycerophospholipids | PC ae C36:5             | 1.31 ± 0.24 | 2.62 ± 0.30 <sup>ab</sup> | 2.81 ± 0.31 <sup>a</sup>  | 2.34 ± 0.32 <sup>b</sup>  | <0.001 | 0.007  |
| Glycerophospholipids | PC ae C38:5             | 3.73 ± 0.83 | 8.31 ± 1.34 <sup>ab</sup> | 8.69 ± 0.62 <sup>a</sup>  | 7.29 ± 1.09 <sup>b</sup>  | <0.001 | 0.017  |
| Glycerophospholipids | PC ae C42:5             | < LOD       | 0.81 ± 0.10 <sup>b</sup>  | 0.86 ± 0.10 <sup>ab</sup> | 0.95 ± 0.10 <sup>a</sup>  | -      | 0.025  |
| Glycerophospholipids | PC ae C44:4             | 0.14 ± 0.05 | 0.19 ± 0.03 <sup>b</sup>  | 0.23 ± 0.03 <sup>a</sup>  | 0.21 ± 0.02 <sup>ab</sup> | 0.005  | 0.039  |
| Glycerophospholipids | lysoPC a C18:0          | 105 ± 21    | 196 ± 30 <sup>b</sup>     | 215 ± 25 <sup>ab</sup>    | 229 ± 28 <sup>a</sup>     | <0.001 | 0.044  |
| Glycosylceramides    | HexCer(d18:1/18:0)      | < LOD       | 0.69 ± 0.23 <sup>ab</sup> | 0.88 ± 0.35 <sup>a</sup>  | 0.56 ± 0.17 <sup>b</sup>  | -      | 0.034  |
| Glycosylceramides    | HexCer(d18:1/22:0)      | 1.43 ± 0.36 | 6.81 ± 1.38 <sup>ab</sup> | 7.69 ± 1.99 <sup>a</sup>  | 5.88 ± 0.96 <sup>b</sup>  | <0.001 | 0.039  |
| Glycosylceramides    | HexCer(d18:1/23:0)      | 0.57 ± 0.10 | 1.92 ± 0.31 <sup>ab</sup> | 2.21 ± 0.41 <sup>a</sup>  | 1.82 ± 0.203 <sup>b</sup> | <0.001 | 0.029  |
| Glycosylceramides    | HexCer(d18:1/24:0)      | 1.10 ± 0.20 | 3.19 ± 0.60 <sup>b</sup>  | 4.07 ± 0.91 <sup>a</sup>  | 2.74 ± 0.49 <sup>b</sup>  | <0.001 | <0.001 |
| Glycosylceramides    | HexCer(d18:1/24:1)      | 1.26 ± 0.27 | 6.72 ± 2.44 <sup>ab</sup> | 7.77 ± 2.30 <sup>a</sup>  | 5.05 ± 1.87 <sup>b</sup>  | <0.001 | 0.034  |
| Glycosylceramides    | HexCer(d18:2/24:0)      | 0.25 ± 0.05 | 0.66 ± 0.12 <sup>b</sup>  | 0.84 ± 0.15 <sup>a</sup>  | 0.65 ± 0.13 <sup>b</sup>  | <0.001 | 0.020  |
| Glycosylceramides    | Hex3Cer(d18:1/26:1)     | < LOD       | 0.34 ± 0.05 <sup>a</sup>  | 0.25 ± 0.09 <sup>ab</sup> | 0.18 ± 0.06 <sup>b</sup>  | -      | 0.009  |
| Indoles derivatives  | Indole-3-propionic acid | 0.30 ± 0.09 | 0.46 ± 0.14 <sup>b</sup>  | 0.51 ± 0.18 <sup>b</sup>  | 1.05 ± 0.27 <sup>a</sup>  | 0.007  | <0.001 |
| Indoles derivatives  | 3-Indoxylsulfate        | 5.03 ± 1.72 | 4.27 ± 1.66 <sup>b</sup>  | 3.61 ± 0.66 <sup>b</sup>  | 5.02 ± 1.21 <sup>a</sup>  | 0.333  | 0.018  |
| Sphingolipids        | SM C18:0                | 1.82 ± 0.38 | 11.7 ± 4.4 <sup>a</sup>   | 11.7 ± 3.8 <sup>a</sup>   | 7.37 ± 1.75 <sup>b</sup>  | <0.001 | 0.014  |
| Sphingolipids        | SM C18:1                | 0.66 ± 0.12 | 2.10 ± 0.55 <sup>ab</sup> | 2.18 ± 0.28 <sup>a</sup>  | 1.68 ± 0.32 <sup>b</sup>  | <0.001 | 0.022  |
| Sphingolipids        | SM C26:1                | 0.20 ± 0.04 | 0.23 ± 0.07 <sup>ab</sup> | 0.30 ± 0.13 <sup>a</sup>  | 0.14 ± 0.07 <sup>b</sup>  | 0.356  | <0.001 |
| Sphingolipids        | SM (OH) C16:1           | 0.24 ± 0.06 | 0.34 ± 0.06 <sup>a</sup>  | 0.35 ± 0.06 <sup>a</sup>  | 0.26 ± 0.05 <sup>b</sup>  | 0.001  | <0.001 |

Data are means  $\pm$  SD, n = 10/group. Abbreviations: aa, diacyl species; ae, acyl-alkyl species, ae, CE, cholesterylester; Cer, ceramide; DCA, deoxycholic acid; DG, diacylglycerol; HexCer, hexosylceramide; Hex3Cer; trihexosylceramide; LOD, limit of detection; lysoPC, lysophosphatidylcholine; PC, phosphatidylcholine; SM, sphingomyelin; TDCA, taurodeoxycholic acid; TLCA, tauroolithocholic acid.

\*Effect of supplementation with insects' cuticles within the obese groups: <sup>a,b</sup>Means without a common letter differ across the obese groups,  $p < 0.05$ .
